# Supplementary material for: CPORT: A Consensus Interface Predictor and Its Performance in Prediction-Driven Docking with HADDOCK
Source: PLOS journal article supplement (doi:10.1371/journal.pone.0017695), 2011-03-25

*Figure S2: Predictions on the bound form (black) versus the unbound form (dashed red)*

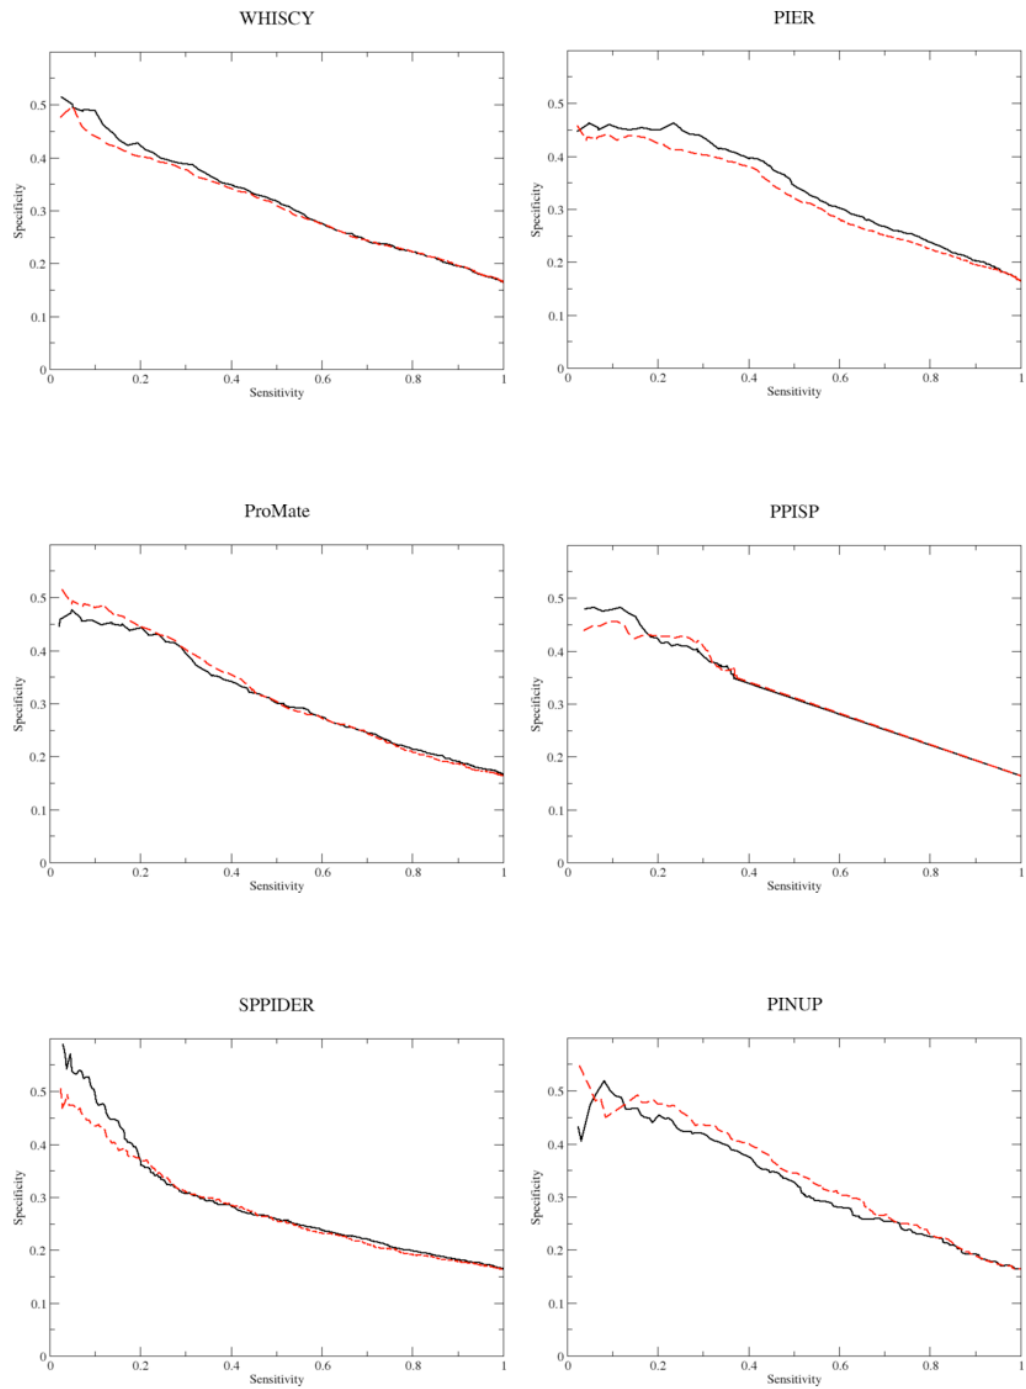

Supplement: S2 (10.1371/journal.pone.0017695.s002) [file journal.pone.0017695.s002]
